# Supplementary material for: Tetraruthenium Macrocycles with Laterally Extended Bis(alkenyl)quinoxaline Ligands and Their F4TCNQ•− Salts
Source: MDPI journal article supplement (doi:10.3390/inorganics10060082), 2022-06-14
Supplement: s1 [file s1]

# Tetraruthenium Macrocycles With Laterally Extended Bis(alkenyl) Ligands and Their F<sub>4</sub>TCNQ<sup>•</sup> Salts

Rajorshi Das <sup>1,\*</sup>, Michael Linseis <sup>1</sup>, Laura Senft <sup>2</sup>, Ivana Ivanović-Burmazović <sup>2</sup> and Rainer F. Winter <sup>1,\*</sup>

## Table of Contents

### List of Figures

|                                                                                                                                                                                                                                                                                                                                                                                                                                                                                                              |    |
|--------------------------------------------------------------------------------------------------------------------------------------------------------------------------------------------------------------------------------------------------------------------------------------------------------------------------------------------------------------------------------------------------------------------------------------------------------------------------------------------------------------|----|
| <b>Figure S1.</b> <sup>1</sup> H NMR spectrum of <b>Ru4-5</b> measured in C <sub>6</sub> D <sub>6</sub> (298 K).....                                                                                                                                                                                                                                                                                                                                                                                         | 3  |
| <b>Figure S2.</b> <sup>31</sup> P{ <sup>1</sup> H} NMR spectrum of <b>Ru4-5</b> measured in C <sub>6</sub> D <sub>6</sub> (298 K).....                                                                                                                                                                                                                                                                                                                                                                       | 3  |
| <b>Figure S3.</b> <sup>1</sup> H NMR spectrum of <b>Ru4-6</b> measured in C <sub>6</sub> D <sub>6</sub> (298 K).....                                                                                                                                                                                                                                                                                                                                                                                         | 4  |
| <b>Figure S4.</b> <sup>31</sup> P{ <sup>1</sup> H} NMR spectrum of <b>Ru4-6</b> measured in C <sub>6</sub> D <sub>6</sub> (298 K).....                                                                                                                                                                                                                                                                                                                                                                       | 4  |
| <b>Figure S5.</b> High-resolution electrospray ionisation mass spectrum (HR ESI-MS) of <b>Ru4-5</b> (+ve ion mode).....                                                                                                                                                                                                                                                                                                                                                                                      | 5  |
| <b>Figure S6.</b> Isotopic pattern of the molecular ion [M] <sup>2+</sup> peak of <b>Ru4-5</b> . Experimentally observed spectrum (black) is displayed on top and simulated spectrum (blue) is at the bottom.....                                                                                                                                                                                                                                                                                            | 5  |
| <b>Figure S7.</b> High-resolution electrospray ionisation mass spectrum (HR ESI-MS) of <b>Ru4-6</b> (+ve ion mode).....                                                                                                                                                                                                                                                                                                                                                                                      | 6  |
| <b>Figure S8.</b> Isotopic pattern of the molecular ion [M] <sup>2+</sup> peak of <b>Ru4-6</b> . Experimentally observed spectrum (black) is displayed on top and simulated spectrum (blue) is at the bottom. ....                                                                                                                                                                                                                                                                                           | 6  |
| <b>Figure S9.</b> The intermolecular hydrogen bonding interactions with the co-crystallized solvent methanol molecules to one of the carboxylate functional groups of <b>Ru4-5</b> is shown. The C atoms at the isopropyl groups of the P <sup>i</sup> Pr <sub>3</sub> ligands are removed for clarity reasons. The ellipsoids are displayed at a 50% probability level. Colour codes: grey, carbon; red, oxygen; orange, phosphorous; white, hydrogen; green, chlorine; and dark turquoise, ruthenium. .... | 8  |
| <b>Figure S10.</b> Cyclic voltammogram of <b>Ru2-3</b> at v = 100 mV/s with 0.1 M TBAPF <sub>6</sub> supporting electrolyte in dichloromethane at 295(±3) K. ....                                                                                                                                                                                                                                                                                                                                            | 9  |
| <b>Figure S11.</b> Cyclic (left) (v = 100 mV/s) and square-wave voltammograms (right) of <b>Ru4-5</b> with 0.1 M TBAPF <sub>6</sub> supporting electrolyte in THF at 295(±3) K.....                                                                                                                                                                                                                                                                                                                          | 9  |
| <b>Figure S12.</b> Cyclic (left) (v = 100 mV/s) and square-wave voltammograms (right) of <b>Ru4-5</b> with 0.1 M TBAPF <sub>6</sub> supporting electrolyte in dichloromethane (DCM) at 295(±3) K.....                                                                                                                                                                                                                                                                                                        | 10 |
| <b>Figure S13.</b> Simulated cyclic voltammogram (v = 400 mV/s) of the two oxidation waves of <b>Ru4-5</b> with 0.1 M TBAPF <sub>6</sub> supporting electrolyte in dichloromethane (DCM) at 295(±3) K. ....                                                                                                                                                                                                                                                                                                  | 10 |
| <b>Figure S14.</b> Cyclic (left) (v = 100 mV/s) and square-wave voltammograms (right) of <b>Ru4-6</b> with 0.1 M TBAPF <sub>6</sub> supporting electrolyte in THF at 295(±3) K.....                                                                                                                                                                                                                                                                                                                          | 11 |
| <b>Figure S15.</b> Cyclic (left) (v = 100 mV/s) and square-wave voltammograms (right) of <b>Ru4-6</b> with 0.1 M TBAPF <sub>6</sub> supporting electrolyte in dichloromethane (DCM) at 295(±3) K.....                                                                                                                                                                                                                                                                                                        | 12 |
| <b>Figure S16.</b> Simulated cyclic voltammogram (v = 100 mV/s) of the two oxidation waves of <b>Ru4-6</b> with 0.1 M TBAPF <sub>6</sub> supporting electrolyte in dichloromethane (DCM) at 295(±3) K. ....                                                                                                                                                                                                                                                                                                  | 12 |
| <b>Figure S17.</b> Changes in the mid-IR [Ru(CO)] spectra of <b>Ru4-5</b> upon oxidation from <b>Ru4-5</b> (blue) to [ <b>Ru4-5</b> ] <sup>2+</sup> (red) and second oxidation from [ <b>Ru4-5</b> ] <sup>2+</sup> to [ <b>Ru4-5</b> ] <sup>4+</sup> (green) in dichloromethane at 298 K. ....                                                                                                                                                                                                               | 13 |
| <b>Figure S18.</b> Deconvoluted [Ru(CO)] spectrum of [ <b>Ru4-5</b> ] <sup>2+</sup> . The red line represents the experimentally observed spectrum and dotted grey lines are individual contributions in the deconvoluted spectra. ....                                                                                                                                                                                                                                                                      | 13 |
| <b>Figure S19.</b> Spectroscopic changes in the NIR region upon oxidation of <b>Ru4-5</b> (blue) to [ <b>Ru4-5</b> ] <sup>2+</sup> (red) and further oxidation to [ <b>Ru4-5</b> ] <sup>4+</sup> (green) in dichloromethane at 298 K. ....                                                                                                                                                                                                                                                                   | 13 |
| <b>Figure S20.</b> Spectroscopic changes in the UV/vis/NIR region upon oxidation of <b>Ru4-5</b> (blue) to [ <b>Ru4-5</b> ] <sup>2+</sup> (red) and further oxidation to [ <b>Ru4-5</b> ] <sup>4+</sup> (green) in dichloromethane at 298 K. ....                                                                                                                                                                                                                                                            | 14 |
| <b>Figure S21.</b> Spectroscopic changes in the UV/vis/NIR region upon oxidation of <b>Ru4-5</b> (blue) to [ <b>Ru4-5</b> ] <sup>2+</sup> (red) in dichloromethane at 298 K. ....                                                                                                                                                                                                                                                                                                                            | 14 |

|                                                                                                                                                                                                                                                                                                                                                                              |    |
|------------------------------------------------------------------------------------------------------------------------------------------------------------------------------------------------------------------------------------------------------------------------------------------------------------------------------------------------------------------------------|----|
| <b>Figure S22.</b> Changes in the mid-IR [Ru(CO)] spectra of <b>Ru4-6</b> upon oxidation from <b>Ru4-6</b> (blue) to [ <b>Ru4-6</b> ] <sup>2+</sup> (red) and second oxidation from [ <b>Ru4-6</b> ] <sup>2+</sup> to [ <b>Ru4-6</b> ] <sup>4+</sup> (green) in dichloromethane at 298 K. ....                                                                               | 15 |
| <b>Figure S23.</b> Deconvoluted [Ru(CO)] spectrum of [ <b>Ru4-6</b> ] <sup>2+</sup> . The red line represents the experimentally observed spectrum and dotted grey lines are the individual contributions to the deconvoluted spectra. ....                                                                                                                                  | 15 |
| <b>Figure S24.</b> Spectroscopic changes in the NIR region upon oxidation of <b>Ru4-6</b> (blue) to [ <b>Ru4-6</b> ] <sup>2+</sup> (red) and further oxidation to [ <b>Ru4-6</b> ] <sup>4+</sup> (green) in dichloromethane at 298 K. ....                                                                                                                                   | 16 |
| <b>Figure S25.</b> Spectroscopic changes in the UV/vis/NIR region upon oxidation of <b>Ru4-6</b> (blue) to [ <b>Ru4-6</b> ] <sup>2+</sup> (red) and further oxidation to [ <b>Ru4-6</b> ] <sup>4+</sup> (green) in dichloromethane at 298 K. ....                                                                                                                            | 16 |
| <b>Figure S26.</b> Contour plots of the calculated HOMO, HOMO-1, LUMO and LUMO+1 of model complex <sup>Me</sup> <b>Ru2-3</b> (PBE1PBE/6-31G(d)PCM(CH <sub>2</sub> Cl-CH <sub>2</sub> Cl). ....                                                                                                                                                                               | 16 |
| <b>Figure S27.</b> Calculated UV-vis-NIR spectrum of [ <sup>Me</sup> <b>Ru2-3</b> ] <sup>2+</sup> in its electronic singlet state as obtained from the TD-DFT calculations. The red colour marks an increase, the blue colour a decrease of electron density during the corresponding electronic transition. ....                                                            | 17 |
| <b>Figure S28.</b> EPR Spectra of [ <b>Ru4-5</b> ] <sup>2+</sup> (left) and [ <b>Ru4-5</b> ] <sup>4+</sup> (right) measured at 298K. ....                                                                                                                                                                                                                                    | 18 |
| <b>Figure S29.</b> EPR Spectra of [ <b>Ru4-6</b> ] <sup>2+</sup> (left) and [ <b>Ru4-6</b> ] <sup>4+</sup> (right) measured at 298K. ....                                                                                                                                                                                                                                    | 18 |
| <b>Figure S30.</b> EPR Spectra of reduced [ <b>Ru4-5</b> ] <sup>2-</sup> (left) and [ <b>Ru4-6</b> ] <sup>2-</sup> (right) measured at 298K. ....                                                                                                                                                                                                                            | 18 |
| <b>Figure S31.</b> Computed spin densities for the radical anion (left), cation (middle) and the dication (right, triplet state) of the model for complex <b>Ru2-3</b> . ....                                                                                                                                                                                                | 19 |
| <b>Figure S32.</b> Charge-transfer salts <b>CT-1</b> (A) and <b>CT-2</b> (B) synthesized for this study. ....                                                                                                                                                                                                                                                                | 19 |
| <b>Figure S33.</b> Monitoring the formation of salt <b>CT-1</b> (1:2 mixture of <b>Ru4-5</b> and F <sub>4</sub> TCNQ) through IR spectroscopy. ....                                                                                                                                                                                                                          | 20 |
| <b>Figure S34.</b> Monitoring the formation of salt <b>CT-2</b> (1:2 mixture of <b>Ru4-6</b> and F <sub>4</sub> TCNQ) through IR spectroscopy. ....                                                                                                                                                                                                                          | 20 |
| <b>Figure S35.</b> The UV/vis/NIR spectrum of <b>CT-2</b> salt (1:2 mixture of <b>Ru4-6</b> and F <sub>4</sub> TCNQ) is plotted with those of the neutral complex, neutral F <sub>4</sub> TCNQ, oxidized complex [ <b>Ru4-6</b> ] <sup>2+</sup> and mono-reduced F <sub>4</sub> TCNQ for comparison purposes. ....                                                           | 21 |
| <b>Figure S36.</b> EPR spectrum of salt <b>CT-2</b> . Separate resonance signals for the radical cation and radical anion are clearly observed. The experimental spectrum is shown at the top and simulated one is at the bottom; g-values of 2.0240 and 1.9876 were obtained for [ <b>Ru4-5</b> ] <sup>2+</sup> and [F <sub>4</sub> TCNQ] <sup>-</sup> , respectively. .... | 21 |

## List of Tables

|                                                                                                                                                                                                   |    |
|---------------------------------------------------------------------------------------------------------------------------------------------------------------------------------------------------|----|
| <b>Table S1.</b> Crystal data and structure refinement for <b>Ru4-5</b> . ....                                                                                                                    | 6  |
| <b>Table S2.</b> Data of cyclic voltammetric measurements of tetraruthenium macrocycle <b>Ru4-5</b> at different scan rates measured in THF/ <sup>n</sup> Bu <sub>4</sub> NPF <sub>6</sub> . .... | 9  |
| <b>Table S3.</b> Data of cyclic voltammetric measurements of tetraruthenium macrocycle <b>Ru4-6</b> at different scan rates measured in THF/ <sup>n</sup> Bu <sub>4</sub> NPF <sub>6</sub> . .... | 11 |

## NMR Spectroscopy

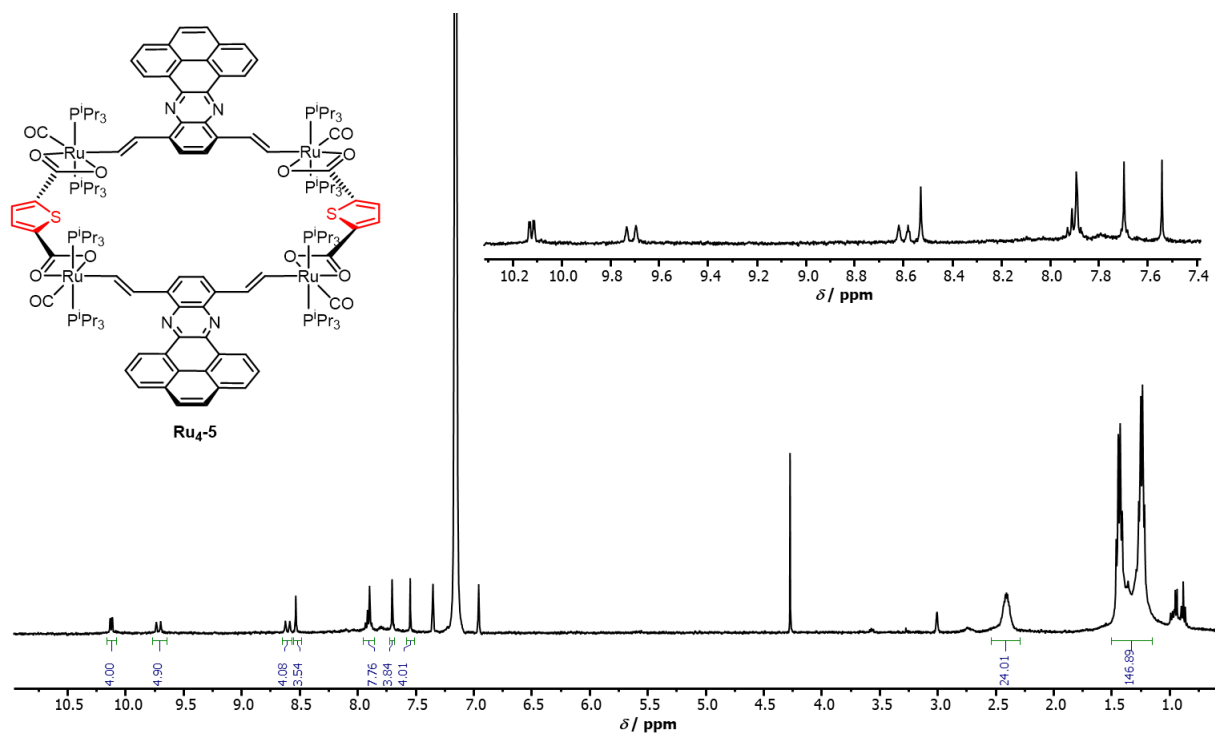

**Figure S1.**  $^1\text{H}$  NMR spectrum of **Ru<sub>4</sub>-5** measured in  $\text{C}_6\text{D}_6$  (298 K).

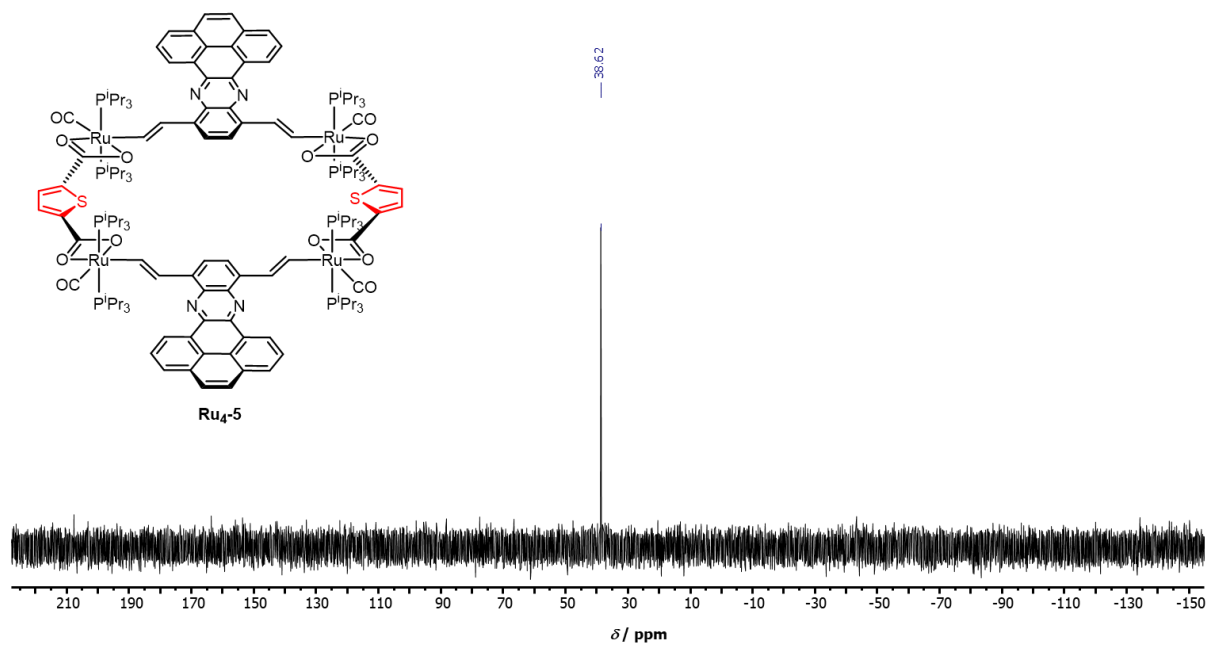

**Figure S2.**  $^{31}\text{P}\{^1\text{H}\}$  NMR spectrum of **Ru<sub>4</sub>-5** measured in  $\text{C}_6\text{D}_6$  (298 K).

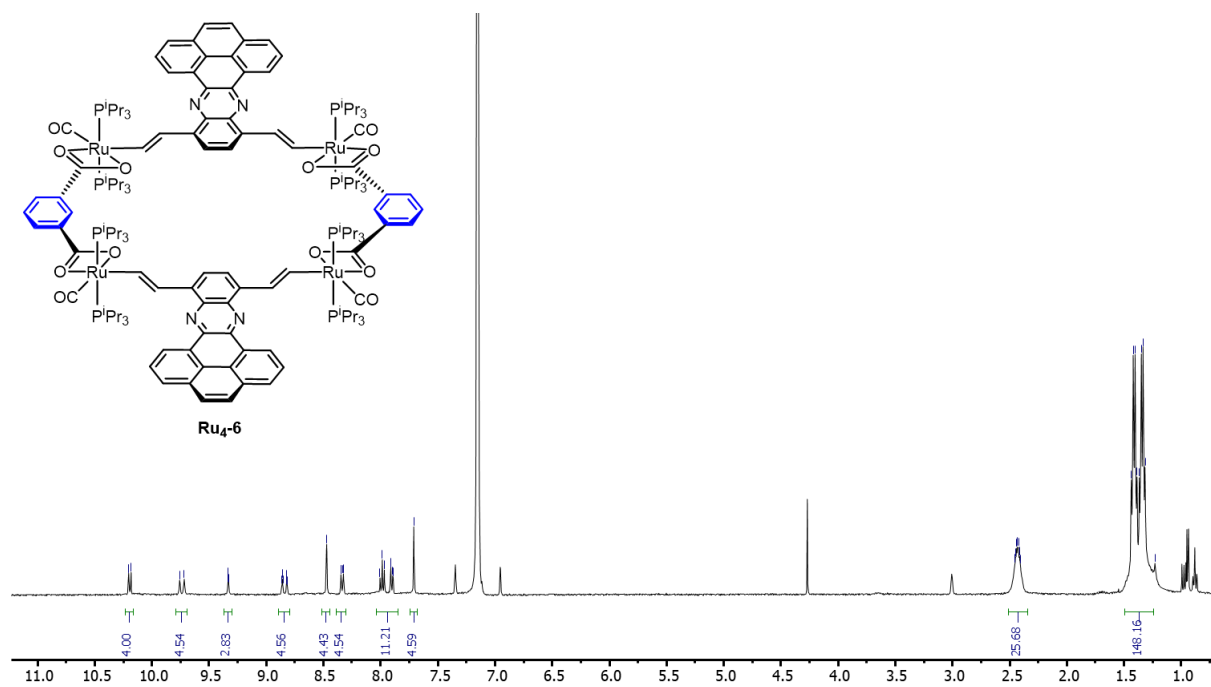

**Figure S3.** <sup>1</sup>H NMR spectrum of **Ru<sub>4</sub>-6** measured in C<sub>6</sub>D<sub>6</sub> (298 K).

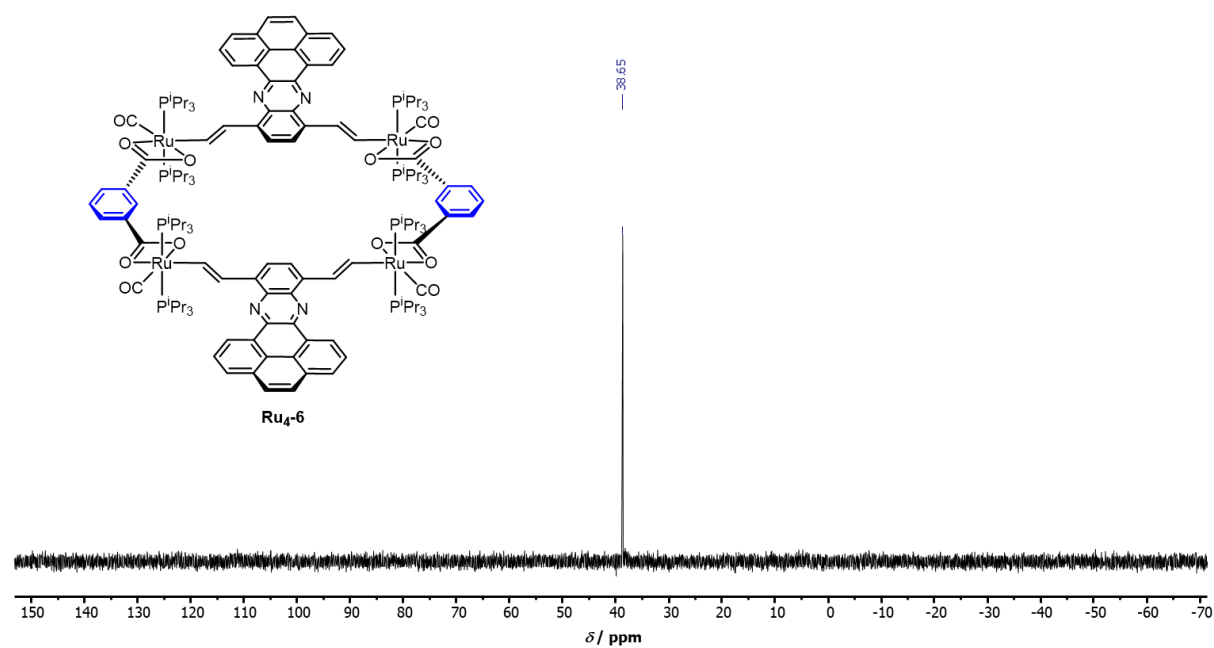

**Figure S4.** <sup>31</sup>P{<sup>1</sup>H} NMR spectrum of **Ru<sub>4</sub>-6** measured in C<sub>6</sub>D<sub>6</sub> (298 K).

## Mass Spectrometry

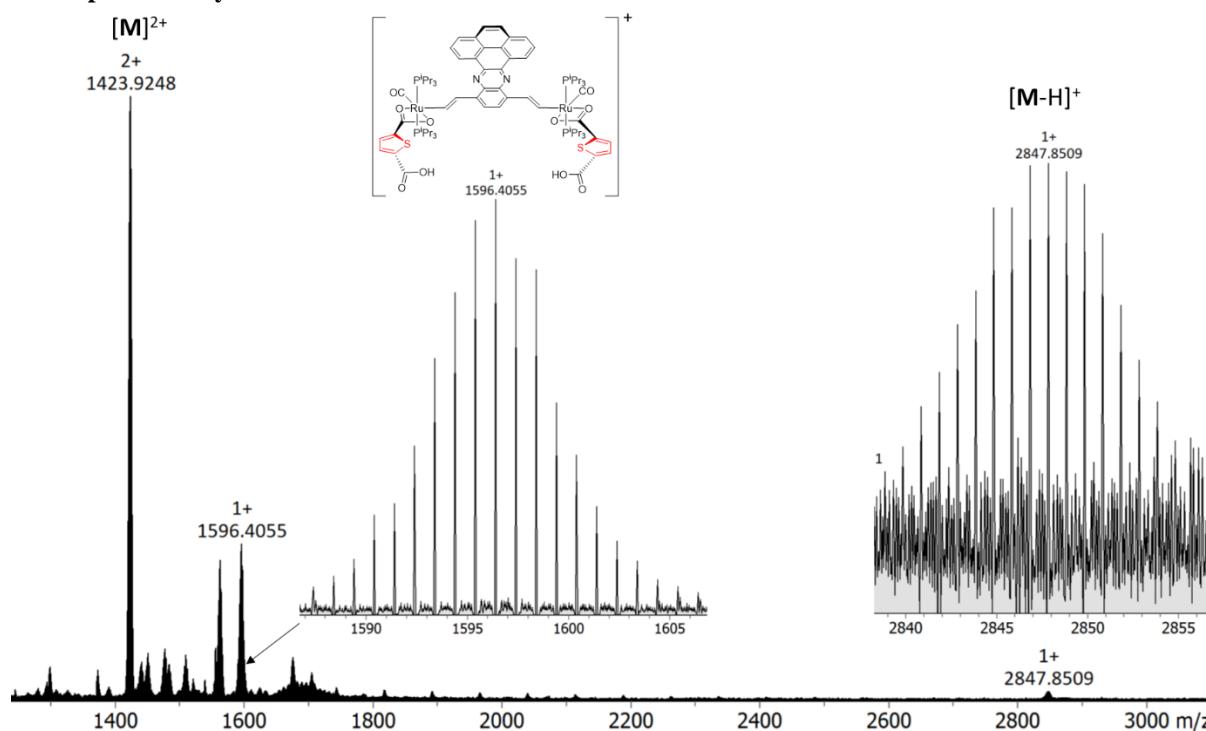

**Figure S5.** High-resolution electrospray ionisation mass spectrum (HR ESI-MS) of **Ru<sub>4</sub>-5** (+ve ion mode).

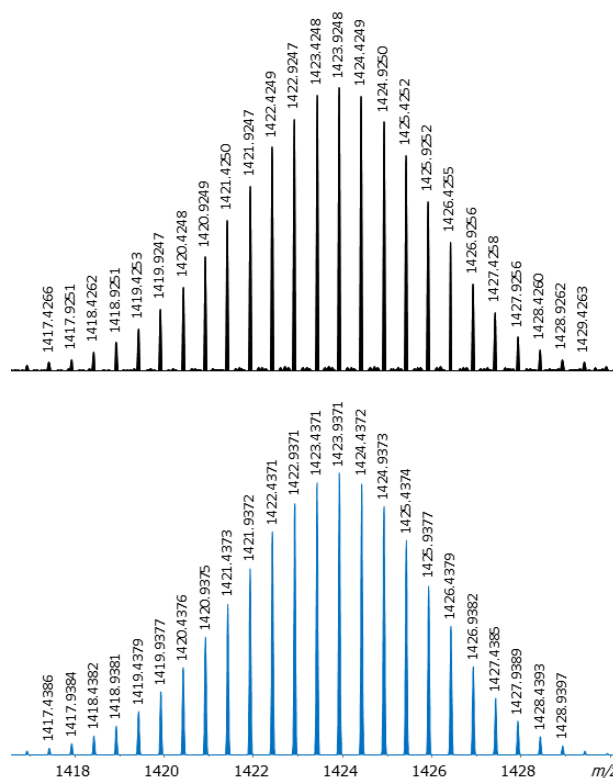

**Figure S6.** Isotopic pattern of the molecular ion  $[M]^{2+}$  peak of **Ru<sub>4</sub>-5**. Experimentally observed spectrum (black) is displayed on top and simulated spectrum (blue) is at the bottom.

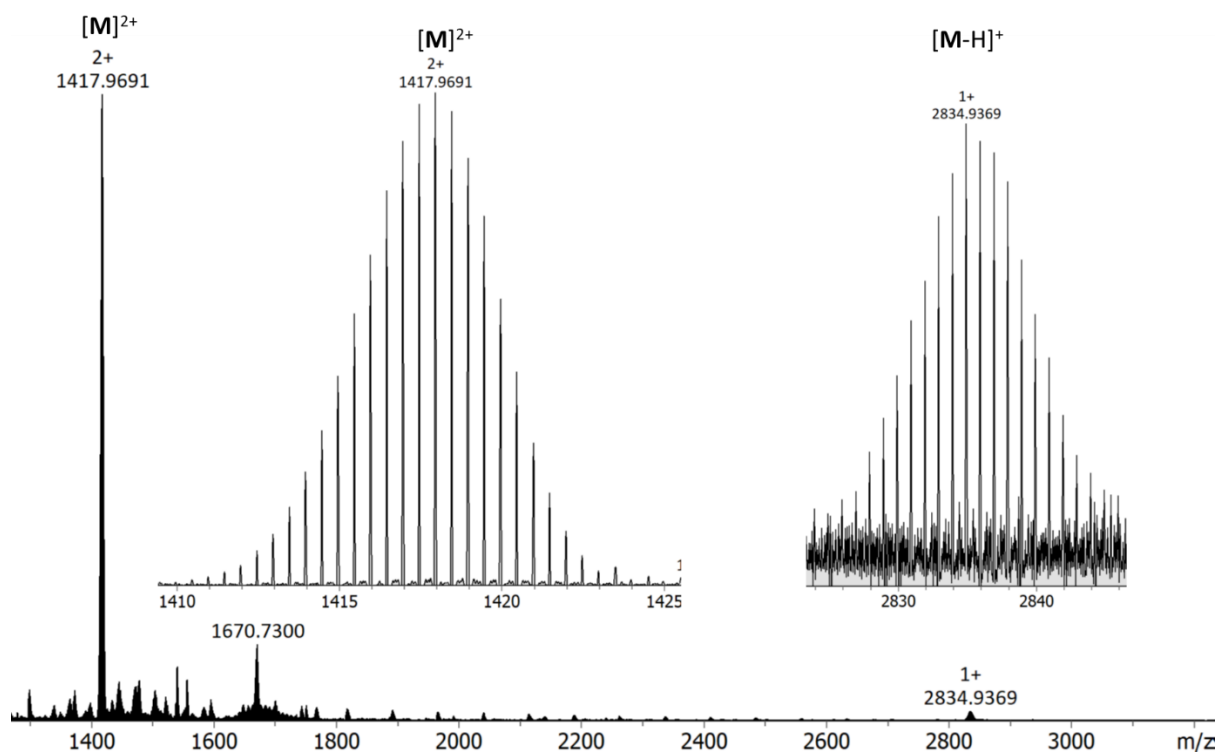

**Figure S7.** High-resolution electrospray ionisation mass spectrum (HR ESI-MS) of **Ru<sub>4</sub>-6** (+ve ion mode).

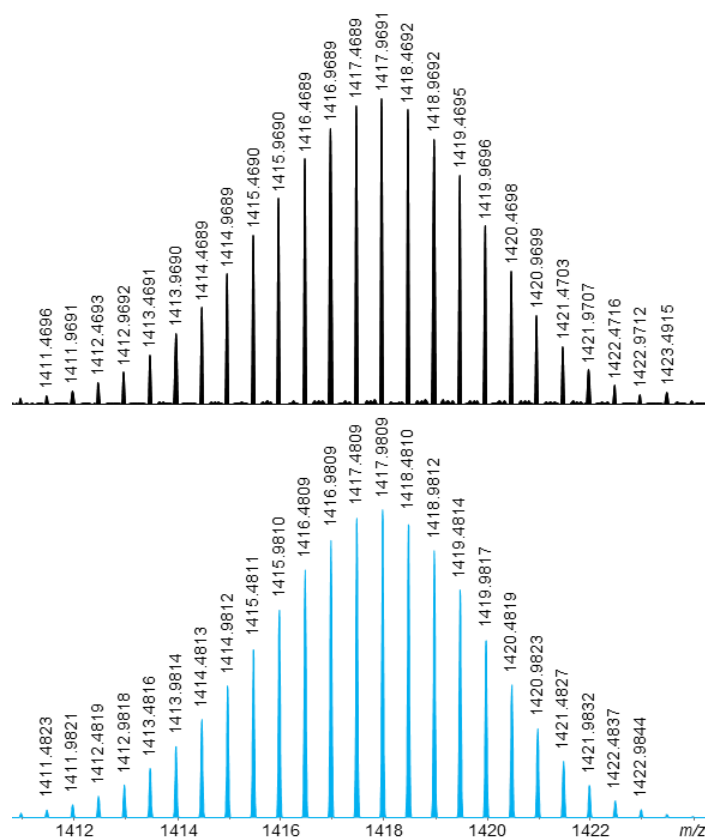

**Figure S8.** Isotopic pattern of the molecular ion  $[M]^{2+}$  peak of **Ru<sub>4</sub>-6**. Experimentally observed spectrum (black) is displayed on top and simulated spectrum (blue) is at the bottom.

**Table S1.** Crystal data and structure refinement for **Ru<sub>4</sub>-5**.

|                                                |                                                                |
|------------------------------------------------|----------------------------------------------------------------|
| CCDC No.                                       | 2172028                                                        |
| Identification code                            | <b>Ru4-5</b>                                                   |
| Empirical formula                              | $C_{72}H_{109}N_2O_8P_4Ru_2S$                                  |
| Formula weight                                 | 1488.69                                                        |
| Temperature/K                                  | 100                                                            |
| Crystal system                                 | monoclinic                                                     |
| Space group                                    | $P2_1/c$                                                       |
| $a/\text{\AA}$                                 | 14.8383(9)                                                     |
| $b/\text{\AA}$                                 | 32.074(3)                                                      |
| $c/\text{\AA}$                                 | 18.0081(12)                                                    |
| $\alpha/^\circ$                                | 90                                                             |
| $\beta/^\circ$                                 | 105.457(5)                                                     |
| $\gamma/^\circ$                                | 90                                                             |
| Volume/ $\text{\AA}^3$                         | 8260.4(12)                                                     |
| $Z$                                            | 4                                                              |
| $\rho_{\text{calc}}/\text{g/cm}^3$             | 1.197                                                          |
| $\mu/\text{mm}^{-1}$                           | 0.516                                                          |
| $F(000)$                                       | 3132.0                                                         |
| Crystal size/ $\text{mm}^3$                    | $0.4 \times 0.203 \times 0.01$                                 |
| Radiation                                      | Mo $K\alpha$ ( $\lambda = 0.71073$ )                           |
| 2 $\Theta$ range for data collection/ $^\circ$ | 3.416 to 44.032                                                |
| Index ranges                                   | $-15 \leq h \leq 15, -28 \leq k \leq 33, -17 \leq l \leq 18$   |
| Reflections collected                          | 21230                                                          |
| Independent reflections                        | 21582 [ $R_{\text{int}} = 0.0656, R_{\text{sigma}} = 0.0770$ ] |
| Data/restraints/parameters                     | 21582/53/870                                                   |
| Goodness-of-fit on $F^2$                       | 0.848                                                          |
| Final $R$ indexes [ $I \geq 2\sigma(I)$ ]      | $R_1 = 0.0764, wR_2 = 0.1935$                                  |
| Final $R$ indexes [all data]                   | $R_1 = 0.1249, wR_2 = 0.2390$                                  |
| Largest diff. peak/hole / $e \text{\AA}^{-3}$  | 0.73/-0.67                                                     |

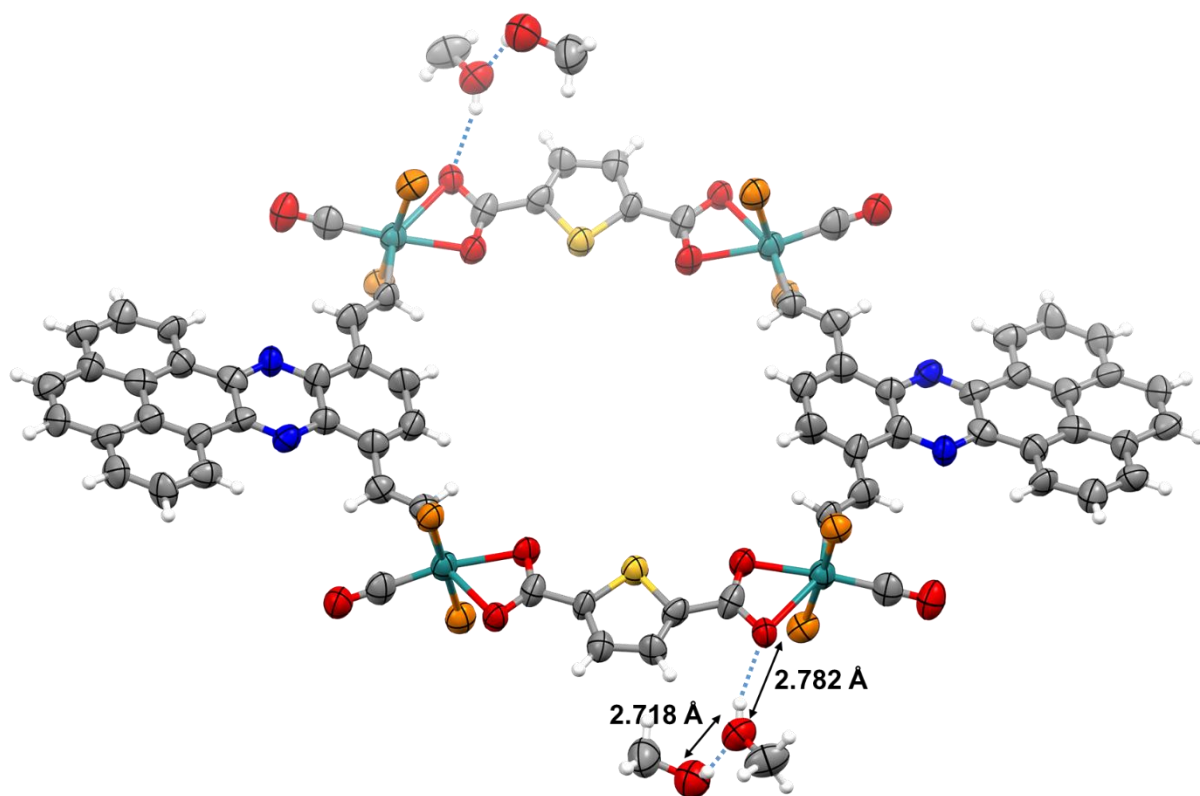

**Figure S9.** The intermolecular hydrogen bonding interactions with the co-crystallized solvent methanol molecules to one of the carboxylate functional groups of **Ru<sub>4</sub>-5** is shown. The C atoms at the isopropyl groups of the P<sup>i</sup>Pr<sub>3</sub> ligands are removed for clarity reasons. The ellipsoids are displayed at a 50% probability level. Colour codes: grey, carbon; red, oxygen; orange, phosphorous; white, hydrogen; green, chlorine; and dark turquoise, ruthenium.



## Cyclic voltammetry

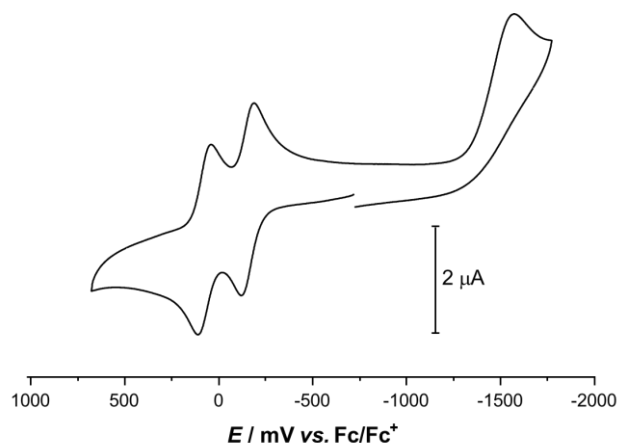

**Figure S10.** Cyclic voltammogram of **Ru<sub>2</sub>-3** at  $\nu = 100$  mV/s with 0.1 M TBAPF<sub>6</sub> supporting electrolyte in dichloromethane at 295(±3) K.

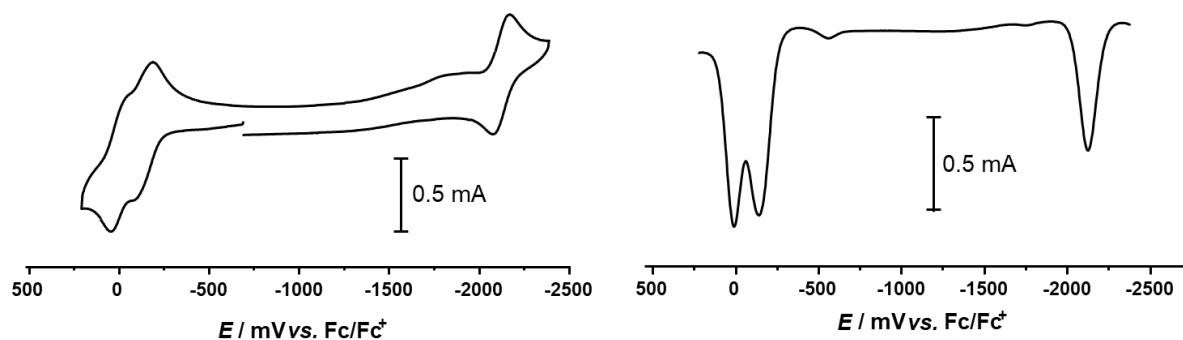

**Figure S11.** Cyclic (left) ( $\nu = 100$  mV/s) and square-wave voltammograms (right) of **Ru<sub>4</sub>-5** with 0.1 M TBAPF<sub>6</sub> supporting electrolyte in THF at 295(±3) K.

**Table S2.** Data of cyclic voltammetric measurements of tetraruthenium macrocycle **Ru<sub>4</sub>-5** at different scan rates measured in THF/<sup>n</sup>Bu<sub>4</sub>NPF<sub>6</sub>.

| Scan rate $\nu$<br>in mV/s | $E_{1/2}^{0/2+}$<br>in mV | $\Delta E_p^{0/2+}$<br>in mV | $E_{1/2}^{2+/4+}$<br>in mV | $\Delta E_p^{2+/4+}$<br>in mV | $E_{1/2}^{0/2-}$<br>in mV | $\Delta E_p^{0/2-}$<br>in mV |
|----------------------------|---------------------------|------------------------------|----------------------------|-------------------------------|---------------------------|------------------------------|
| 100                        | -134                      | 101                          | -6                         | 106                           | -2118                     | 96.5                         |
| 200                        | -137                      | 102                          | -5                         | 95                            | -2123                     | 107                          |
| 400                        | -139                      | 105                          | 0                          | 79                            | -2119                     | 108                          |
| 600                        | -135                      | 113                          | 4                          | 82                            | -2121                     | 113                          |
| 800                        | -140                      | 111                          | 5                          | 79                            | -2121                     | 125                          |
| 1000                       | -140                      | 110                          | 3                          | 87                            | -2124                     | 129                          |
| 1500                       | -141                      | 117                          | 3                          | 93                            | -2124                     | 141                          |
| 2000                       | -135                      | 128                          | 7                          | 94                            | -2124                     | 149                          |

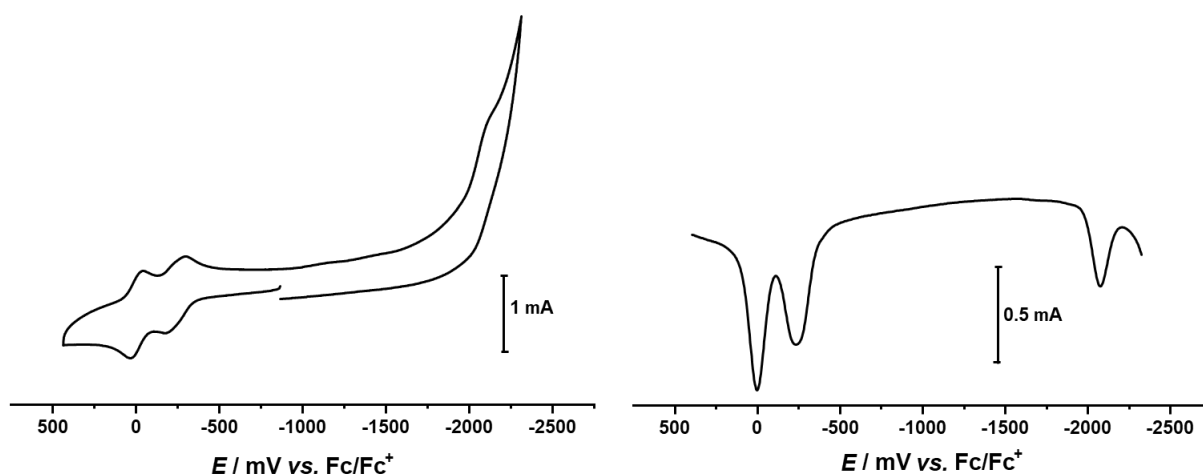

**Figure S12.** Cyclic (left) ( $\nu = 100$  mV/s) and square-wave voltammograms (right) of **Ru<sub>4</sub>-5** with 0.1 M TBAPF<sub>6</sub> supporting electrolyte in dichloromethane (DCM) at 295( $\pm$ 3) K.

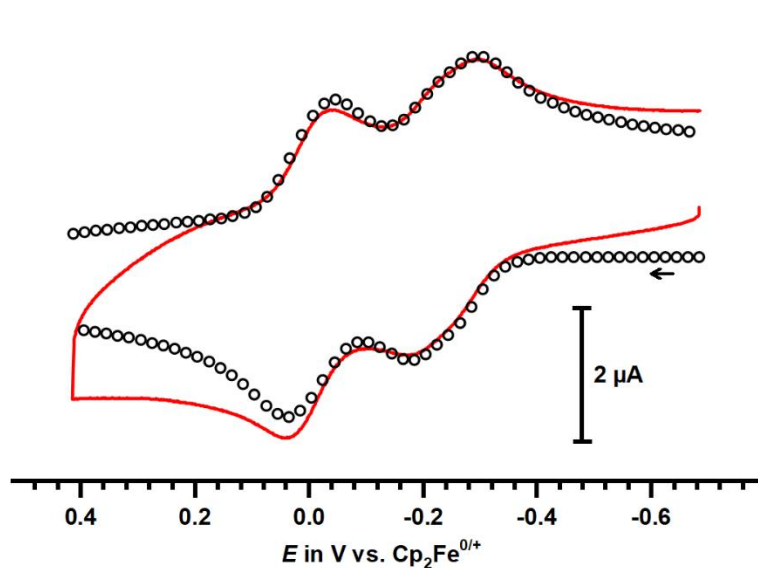

**Figure S13.** Simulated cyclic voltammogram ( $\nu = 400$  mV/s) of the two oxidation waves of **Ru<sub>4</sub>-5** with 0.1 M TBAPF<sub>6</sub> supporting electrolyte in dichloromethane (DCM) at 295( $\pm$ 3) K.

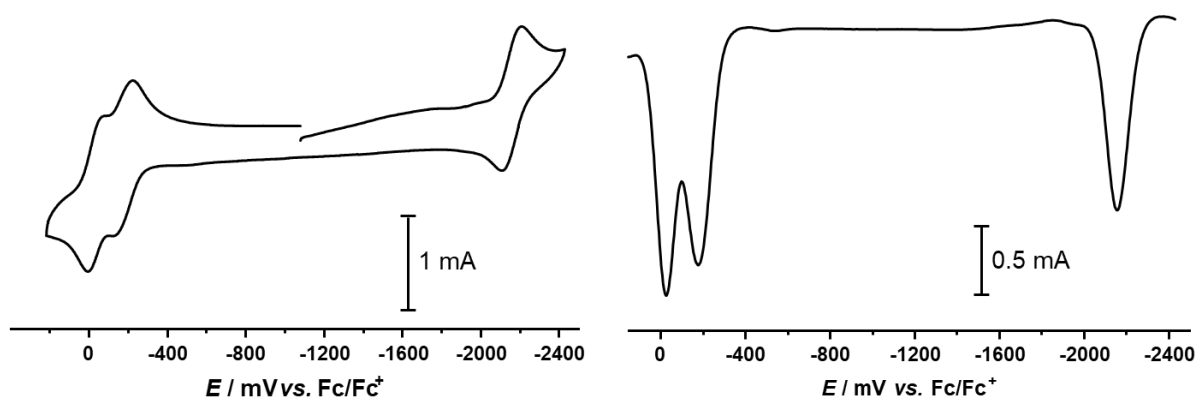

**Figure S14.** Cyclic (left) ( $\nu = 100$  mV/s) and square-wave voltammograms (right) of **Ru<sub>4</sub>-6** with 0.1 M TBAPF<sub>6</sub> supporting electrolyte in THF at 295( $\pm$ 3) K.

**Table S3.** Data of cyclic voltammetric measurements of tetraruthenium macrocycle **Ru<sub>4</sub>-6** at different scan rates measured in THF/<sup>n</sup>Bu<sub>4</sub>NPF<sub>6</sub>.

| Scan rate $\nu$<br>in mV/s | $E_{1/2}^{0/2+}$<br>in mV | $\Delta E_p^{0/2+}$<br>in mV | $E_{1/2}^{2+/4+}$<br>in mV | $\Delta E_p^{2+/4+}$<br>in mV | $E_{1/2}^{0/2-}$<br>in mV | $\Delta E_p^{0/2-}$<br>in mV |
|----------------------------|---------------------------|------------------------------|----------------------------|-------------------------------|---------------------------|------------------------------|
| 25                         | -170                      | 98                           | -29                        | 75                            | -2151                     | 97                           |
| 50                         | -173                      | 93                           | -30                        | 73                            | -2150                     | 92                           |
| 100                        | -173                      | 99                           | -32                        | 77                            | -2148                     | 103                          |
| 200                        | -175                      | 103                          | -32                        | 83                            | -2151                     | 111                          |
| 400                        | -172                      | 103                          | -30                        | 84                            | -2155                     | 110                          |
| 600                        | -176                      | 106                          | -40                        | 89                            | -2152                     | 117                          |
| 800                        | -173                      | 115                          | -35                        | 85                            | -2151                     | 126                          |
| 1000                       | -174                      | 112                          | -31                        | 91                            | -2152                     | 135                          |
| 1500                       | -172                      | 117                          | -29                        | 100                           | -2154                     | 139                          |
| 2000                       | -172                      | 124                          | -30                        | 101                           | -2155                     | 150                          |

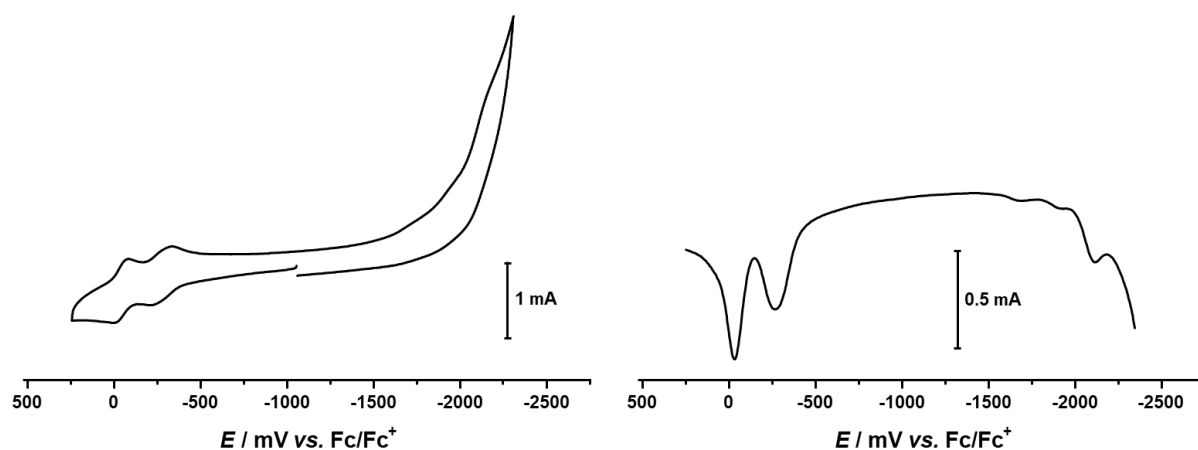

**Figure S15.** Cyclic (left) ( $\nu = 100$  mV/s) and square-wave voltammograms (right) of **Ru<sub>4</sub>-6** with 0.1 M TBAPF<sub>6</sub> supporting electrolyte in dichloromethane (DCM) at 295(±3) K.

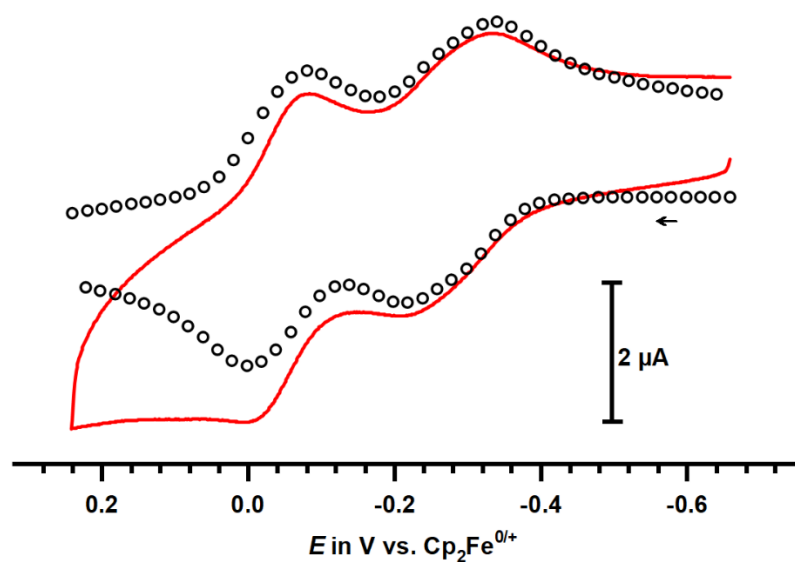

**Figure S16.** Simulated cyclic voltammogram ( $\nu = 100$  mV/s) of the two oxidation waves of **Ru<sub>4</sub>-6** with 0.1 M TBAPF<sub>6</sub> supporting electrolyte in dichloromethane (DCM) at 295(±3) K.

Spectra recorded from chemically or electrochemically oxidized compounds

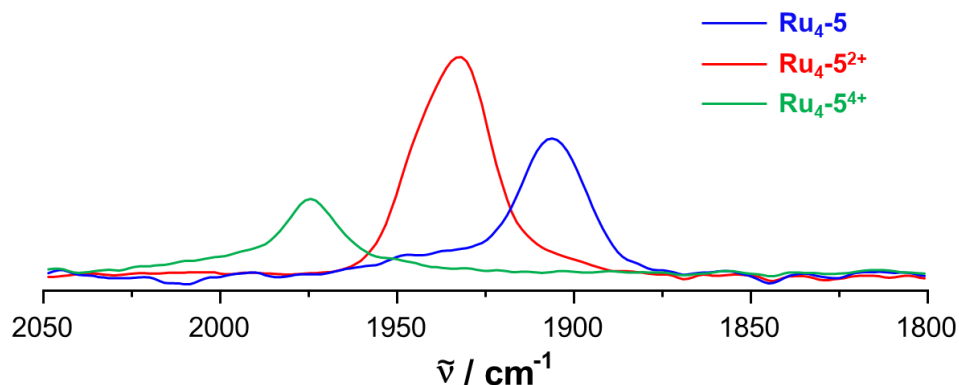

**Figure S17.** Changes in the mid-IR  $[\text{Ru}(\text{CO})]$  spectra of  $\text{Ru}_4\text{-5}$  upon oxidation from  $\text{Ru}_4\text{-5}$  (blue) to  $[\text{Ru}_4\text{-5}]^{2+}$  (red) and second oxidation from  $[\text{Ru}_4\text{-5}]^{2+}$  to  $[\text{Ru}_4\text{-5}]^{4+}$  (green) in dichloromethane at 298 K.

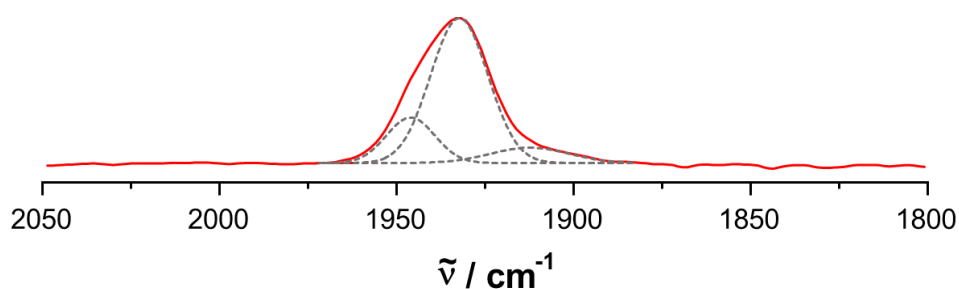

**Figure S18.** Deconvoluted  $[\text{Ru}(\text{CO})]$  spectrum of  $[\text{Ru}_4\text{-5}]^{2+}$ . The red line represents the experimentally observed spectrum and dotted grey lines are individual contributions in the deconvoluted spectra.

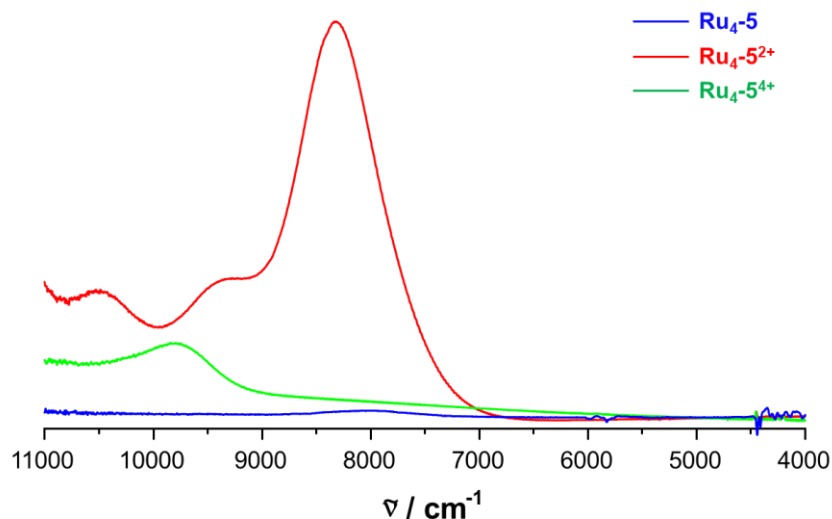

**Figure S19.** Spectroscopic changes in the NIR region upon oxidation of  $\text{Ru}_4\text{-5}$  (blue) to  $[\text{Ru}_4\text{-5}]^{2+}$  (red) and further oxidation to  $[\text{Ru}_4\text{-5}]^{4+}$  (green) in dichloromethane at 298 K.

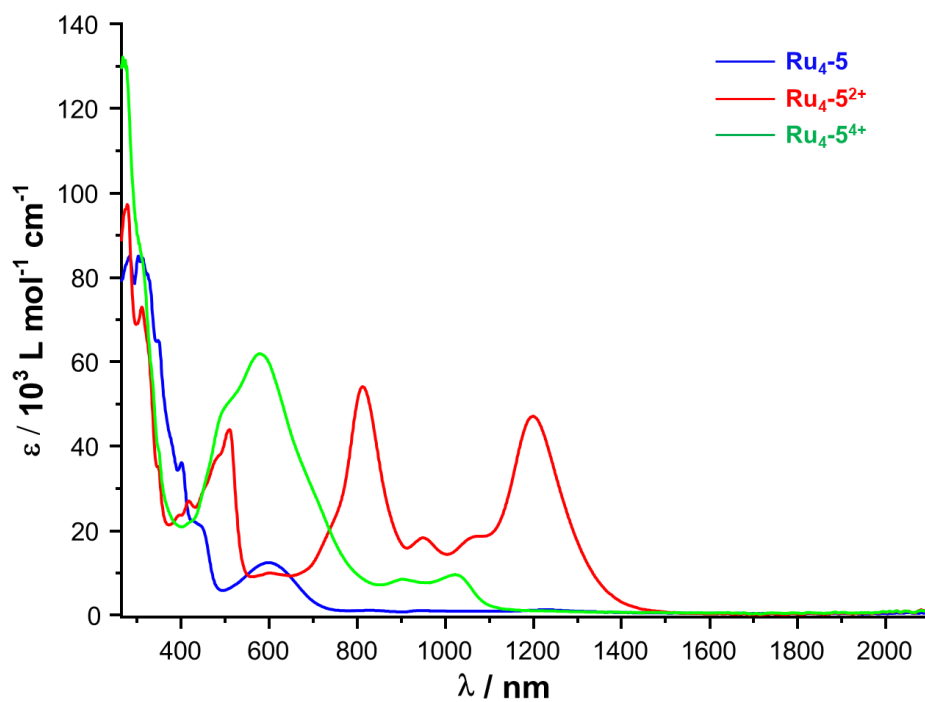

**Figure S20.** Spectroscopic changes in the UV/vis/NIR region upon oxidation of  $\text{Ru}_4\text{-5}$  (blue) to  $[\text{Ru}_4\text{-5}]^{2+}$  (red) and further oxidation to  $[\text{Ru}_4\text{-5}]^{4+}$  (green) in dichloromethane at 298 K.

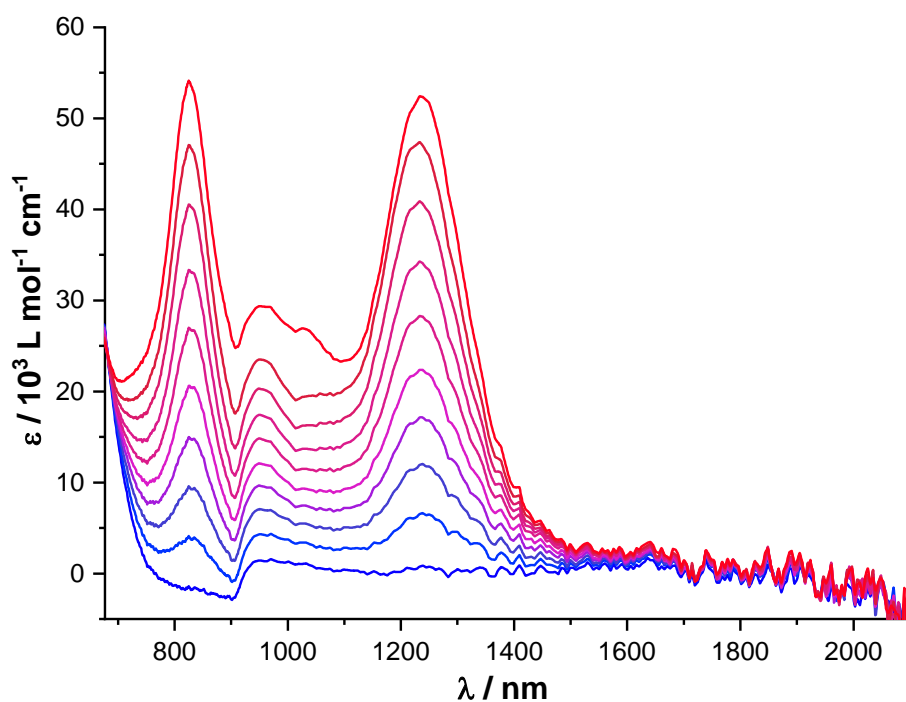

**Figure S21.** Spectroscopic changes in the UV/vis/NIR region upon oxidation of  $\text{Ru}_4\text{-5}$  (blue) to  $[\text{Ru}_4\text{-5}]^{2+}$  (red) in dichloromethane at 298 K.

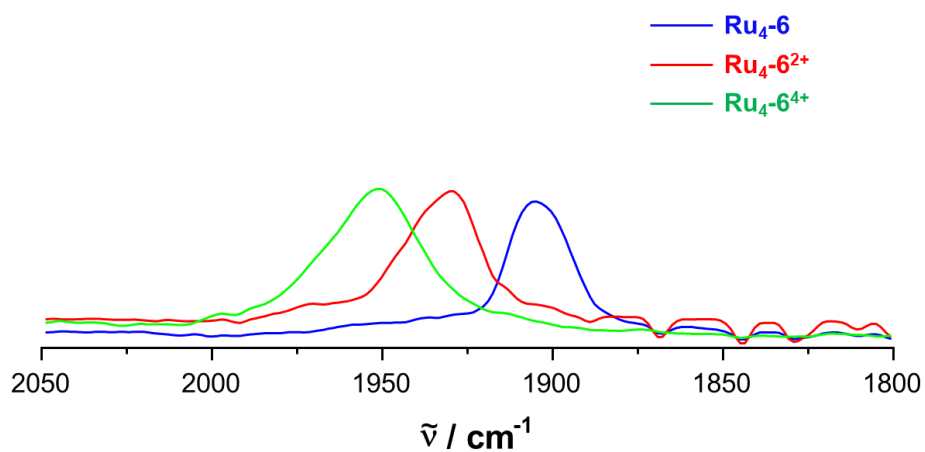

**Figure S22.** Changes in the mid-IR [Ru(CO)] spectra of  $\text{Ru}_4\text{-6}$  upon oxidation from  $\text{Ru}_4\text{-6}$  (blue) to  $[\text{Ru}_4\text{-6}]^{2+}$  (red) and second oxidation from  $[\text{Ru}_4\text{-6}]^{2+}$  to  $[\text{Ru}_4\text{-6}]^{4+}$  (green) in dichloromethane at 298 K.

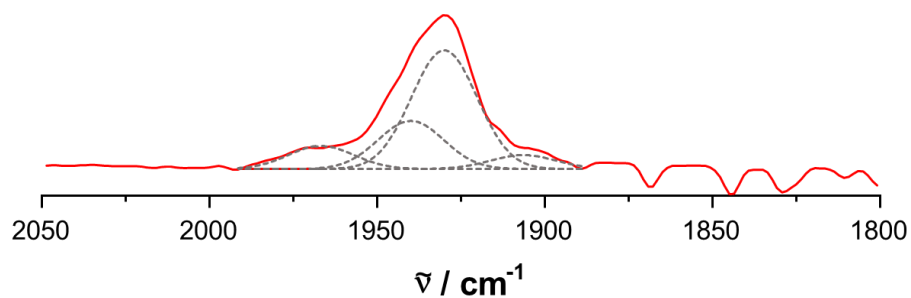

**Figure S23.** Deconvoluted [Ru(CO)] spectrum of  $[\text{Ru}_4\text{-6}]^{2+}$ . The red line represents the experimentally observed spectrum and dotted grey lines are the individual contributions to the deconvoluted spectra.

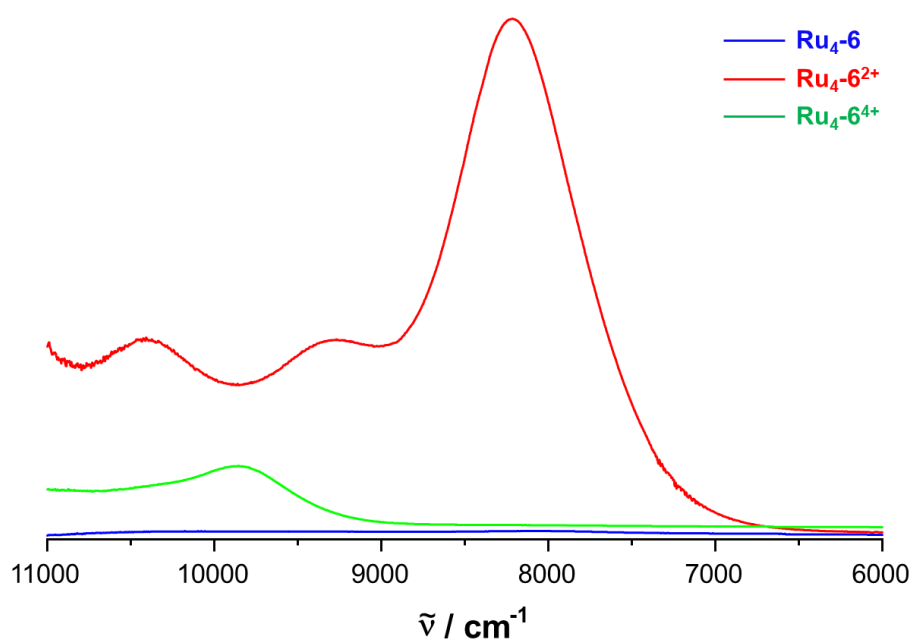

**Figure S24.** Spectroscopic changes in the NIR region upon oxidation of **Ru<sub>4</sub>-6** (blue) to [**Ru<sub>4</sub>-6**]<sup>2+</sup> (red) and further oxidation to [**Ru<sub>4</sub>-6**]<sup>4+</sup> (green) in dichloromethane at 298 K.

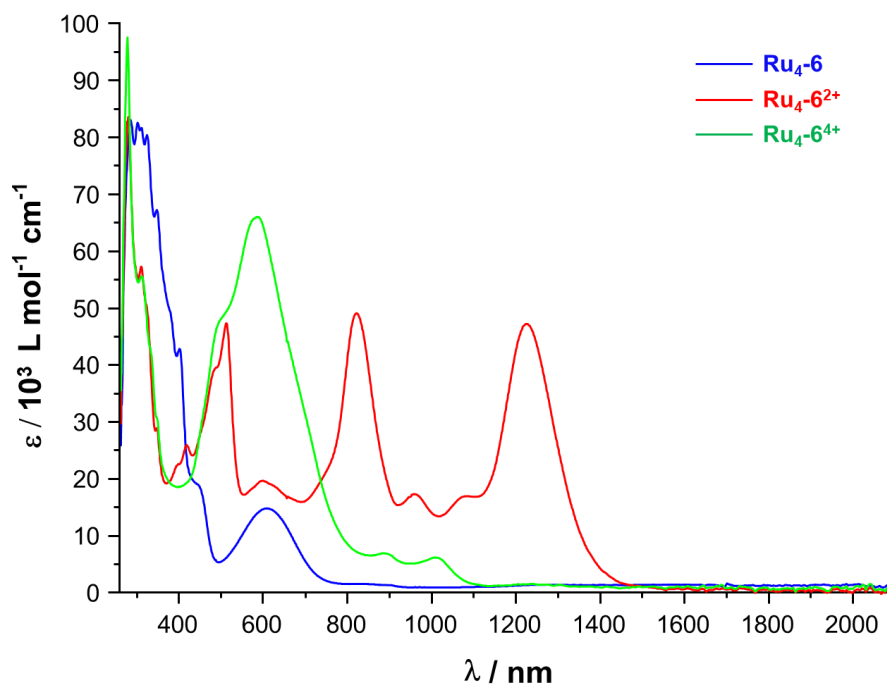

**Figure S25.** Spectroscopic changes in the UV/vis/NIR region upon oxidation of **Ru<sub>4</sub>-6** (blue) to [**Ru<sub>4</sub>-6**]<sup>2+</sup> (red) and further oxidation to [**Ru<sub>4</sub>-6**]<sup>4+</sup> (green) in dichloromethane at 298 K.

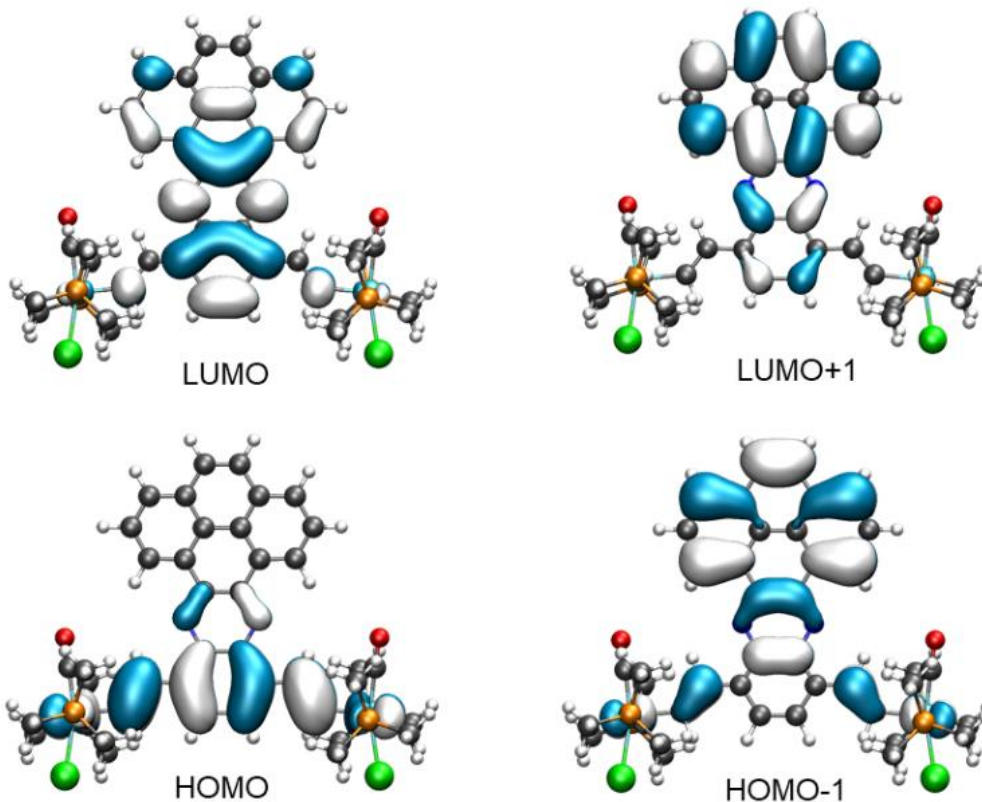

**Figure S26.** Contour plots of the calculated HOMO, HOMO-1, LUMO and LUMO+1 of model complex <sup>Me</sup>**Ru<sub>2</sub>-3** (PBE1PBE/6-31G(d)PCM(CH<sub>2</sub>Cl-CH<sub>2</sub>Cl)).



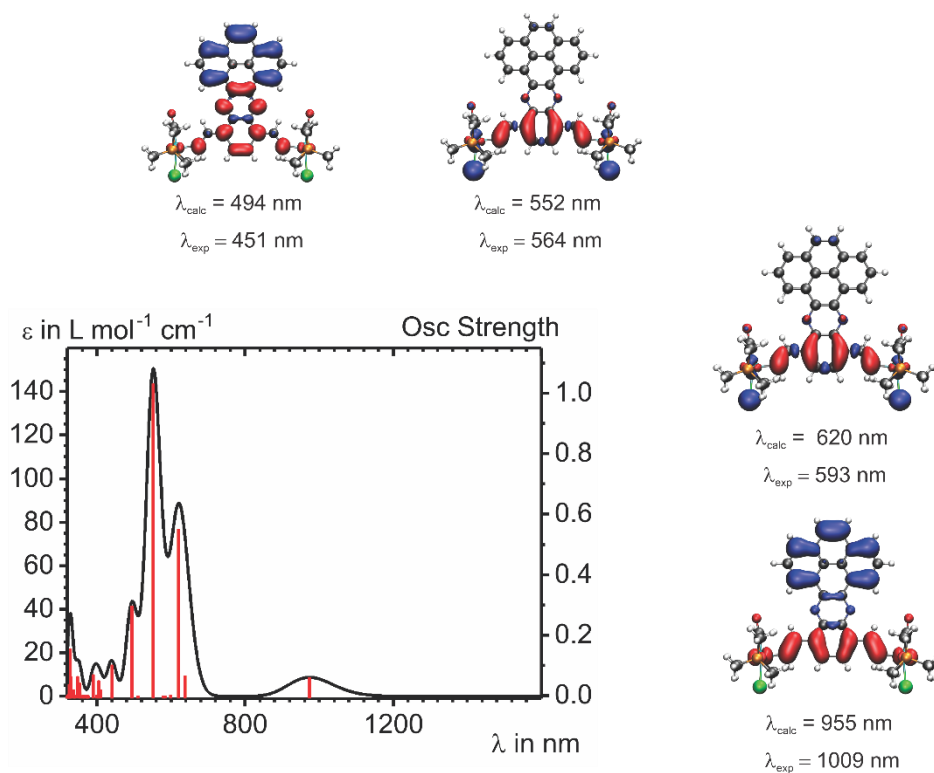

**Figure S27.** Calculated UV-vis-NIR spectrum of  $[\text{MeRu}_2\text{-3}]^{2+}$  in its electronic singlet state as obtained from the TD-DFT calculations. The red colour marks an increase, the blue colour a decrease of electron density during the corresponding electronic transition.

## EPR Spectroscopy

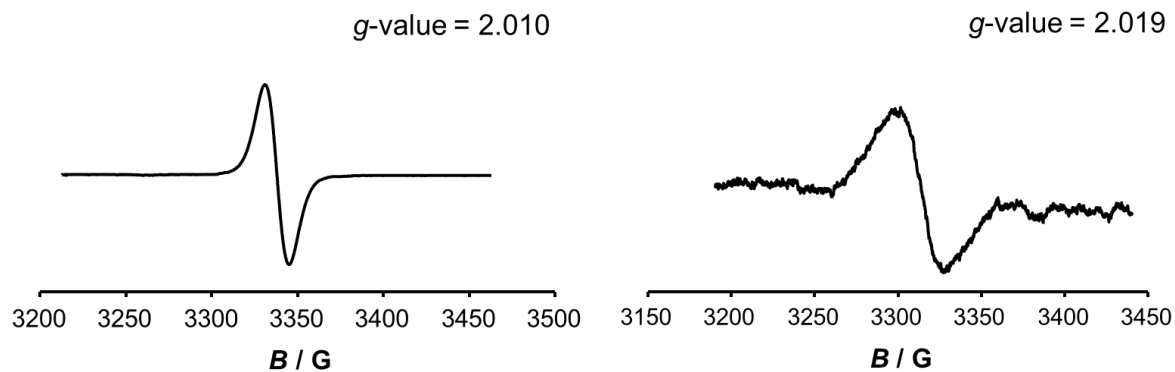

**Figure S28.** EPR Spectra of  $[\text{Ru}_4\text{-5}]^{2+}$  (left) and  $[\text{Ru}_4\text{-5}]^{4+}$  (right) measured at 298K.

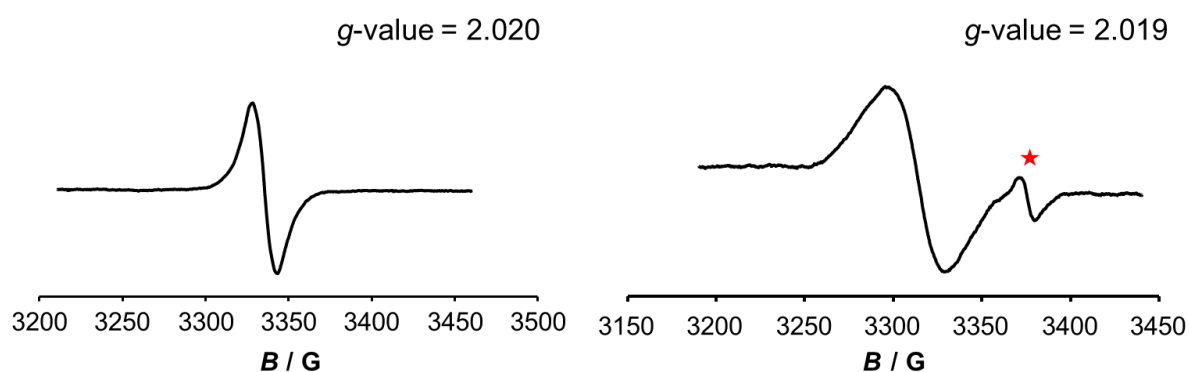

**Figure S29.** EPR Spectra of  $[\text{Ru}_4\text{-6}]^{2+}$  (left) and  $[\text{Ru}_4\text{-6}]^{4+}$  (right) measured at 298K.

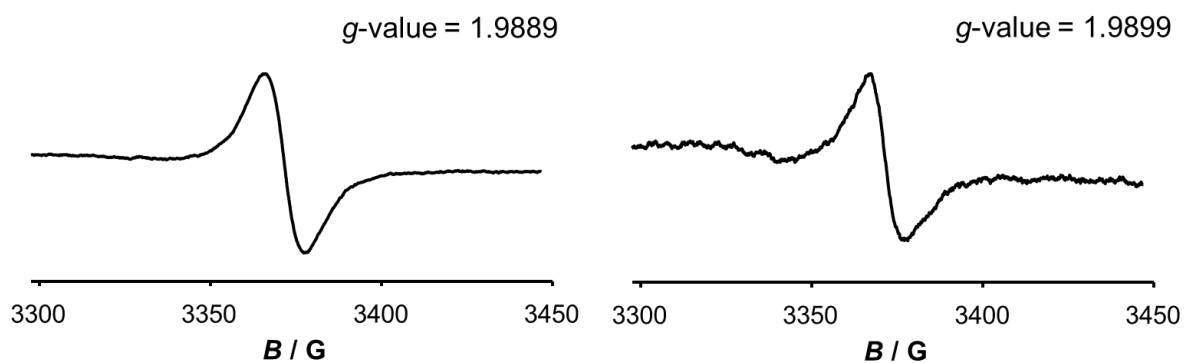

**Figure S30.** EPR Spectra of reduced  $[\text{Ru}_4\text{-5}]^{2-}$  (left) and  $[\text{Ru}_4\text{-6}]^{2-}$  (right) measured at 298K.

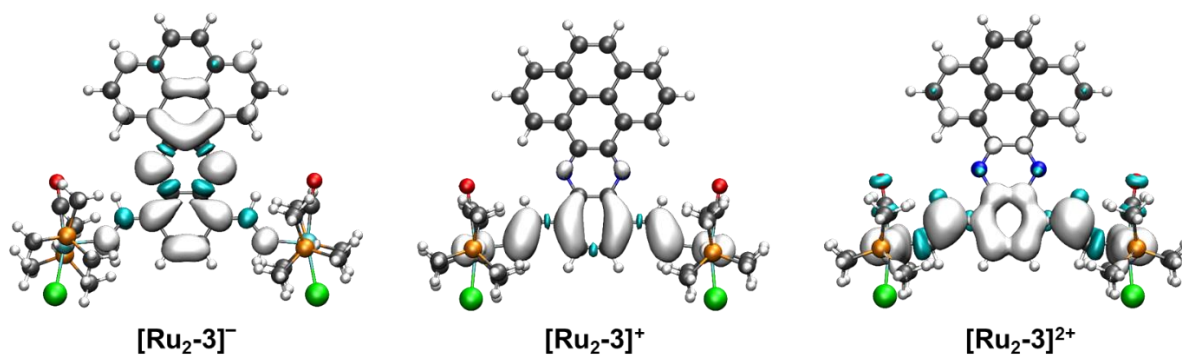

**Figure S31.** Computed spin densities for the radical anion (left), cation (middle) and the dication (right, triplet state) of the model for complex **Ru<sub>2</sub>-3**.

### Synthesis and characterization of charge-transfer salts

Dichloromethane solutions of complexes **Ru<sub>4</sub>-5**, **Ru<sub>4</sub>-6** and F<sub>4</sub>TCNQ were prepared in separate flasks. Then, for the synthesis of the CT salts, one equivalent of complex and two equivalents of F<sub>4</sub>TCNQ were mixed. Immediate changes of colours from leafy-green to pale yellow-green (for [**Ru<sub>4</sub>-5**]<sup>2+</sup> [F<sub>4</sub>TCNQ]<sup>•-</sup>]<sub>2</sub>, **CT-1**) and dark green to yellow-green (for [**Ru<sub>4</sub>-6**]<sup>2+</sup> [F<sub>4</sub>TCNQ]<sup>•-</sup>]<sub>2</sub>, **CT-2**) were observed. Both the charge-transfer salts were characterized by EPR, IR and UV-vis-NIR spectroscopy.

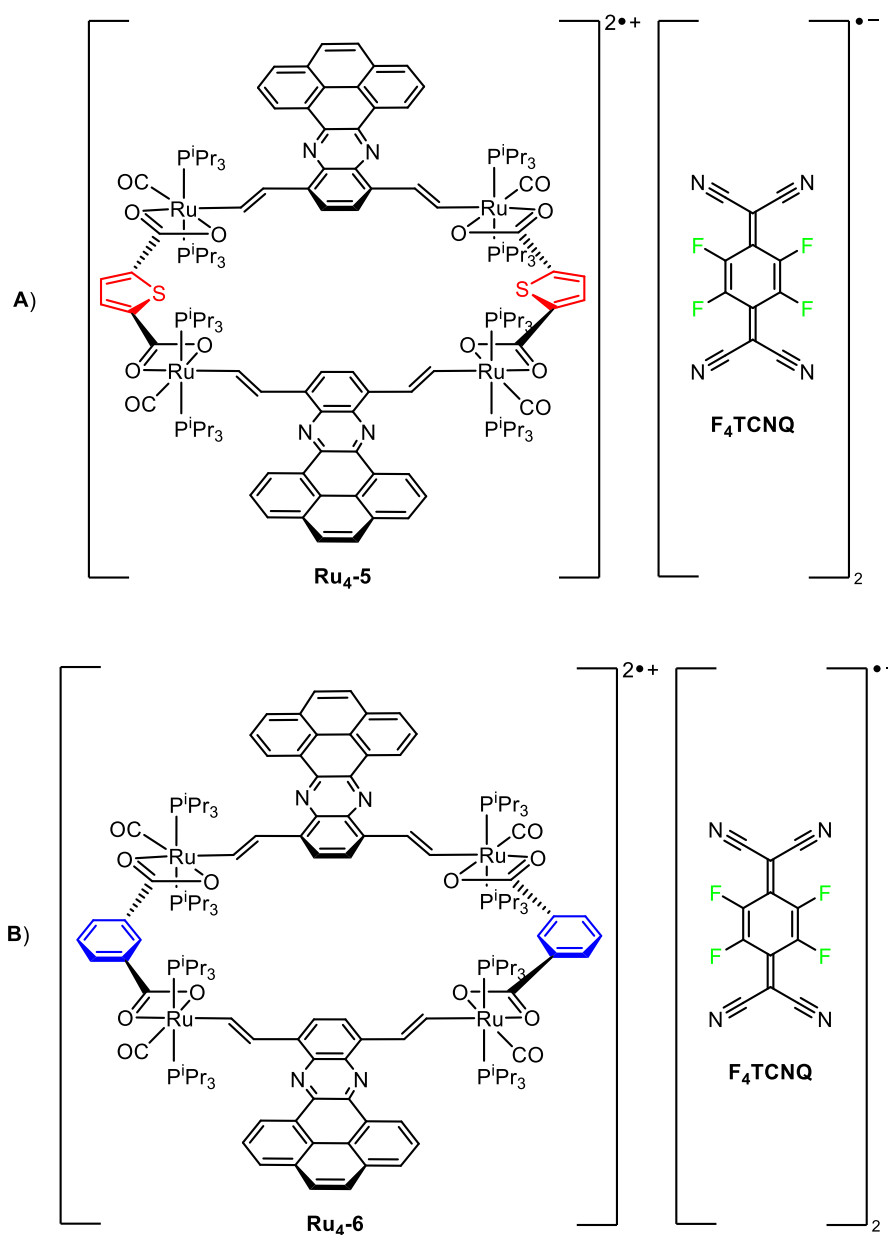

**Figure S32.** Charge-transfer salts **CT-1** (A) and **CT-2** (B) synthesized for this study.

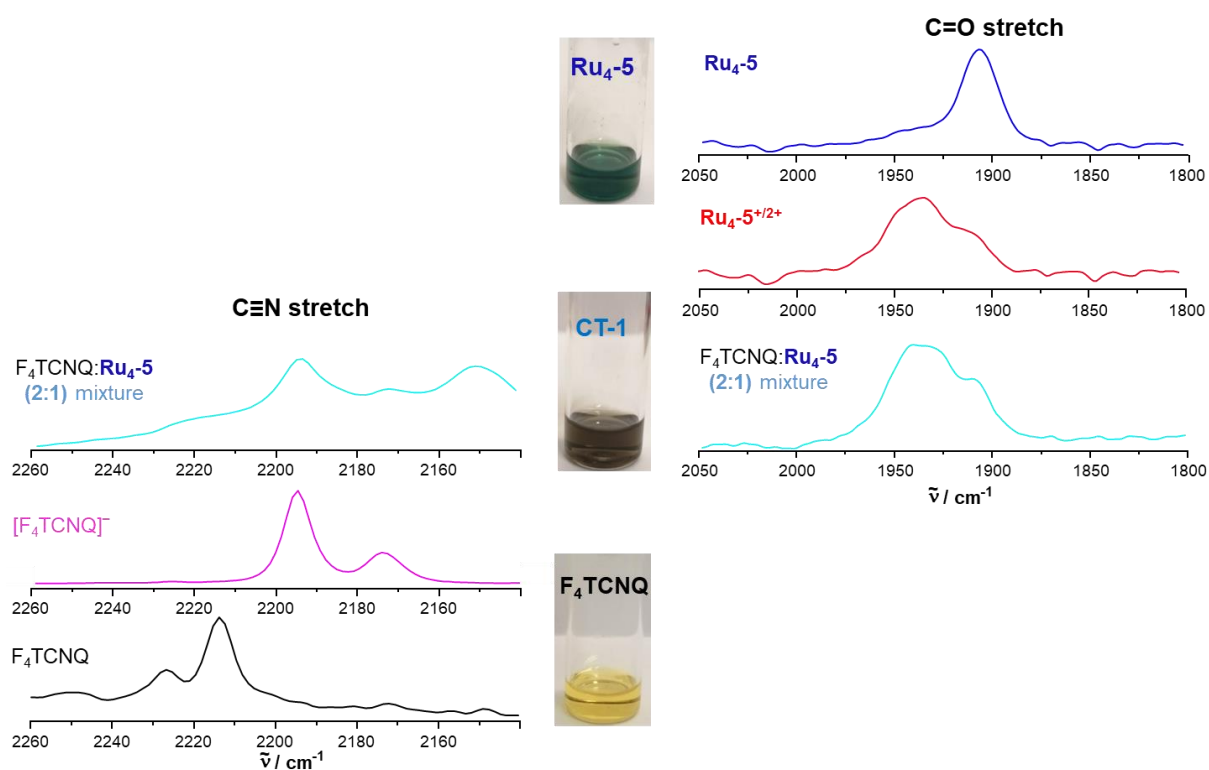

**Figure S33.** Monitoring the formation of salt CT-1 (1:2 mixture of  $\text{Ru}_4\text{-5}$  and  $\text{F}_4\text{TCNQ}$ ) through IR spectroscopy.

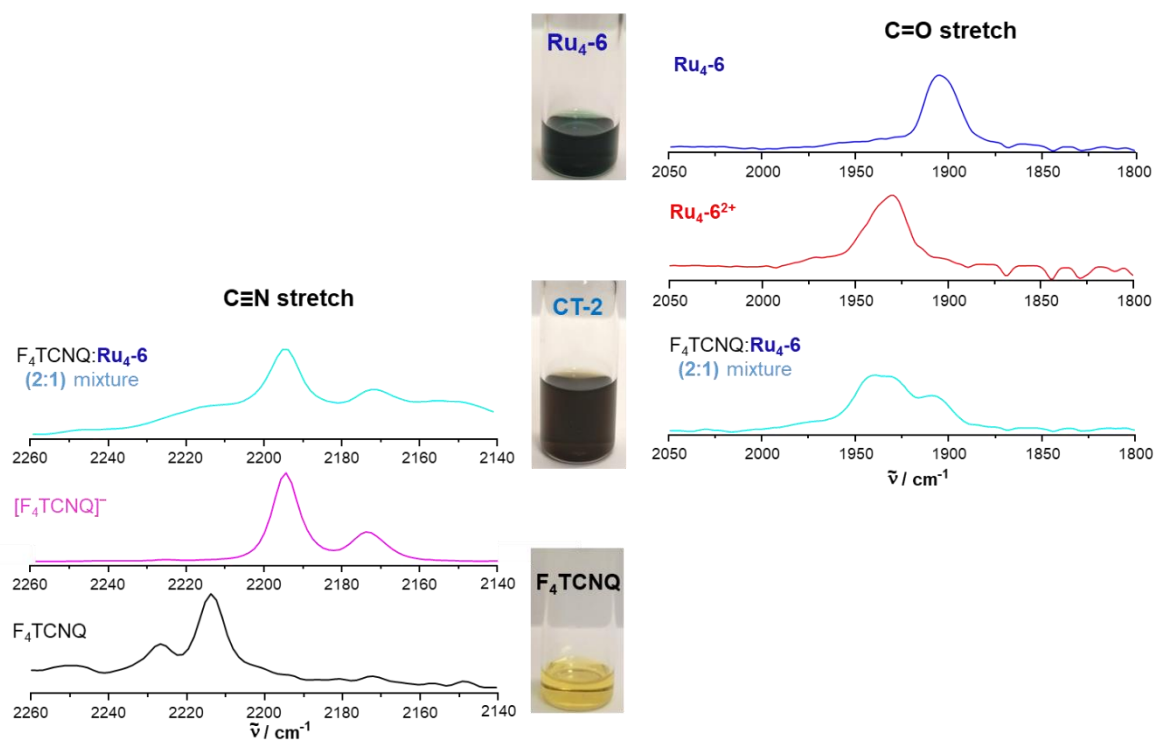

**Figure S34.** Monitoring the formation of salt CT-2 (1:2 mixture of  $\text{Ru}_4\text{-6}$  and  $\text{F}_4\text{TCNQ}$ ) through IR spectroscopy.

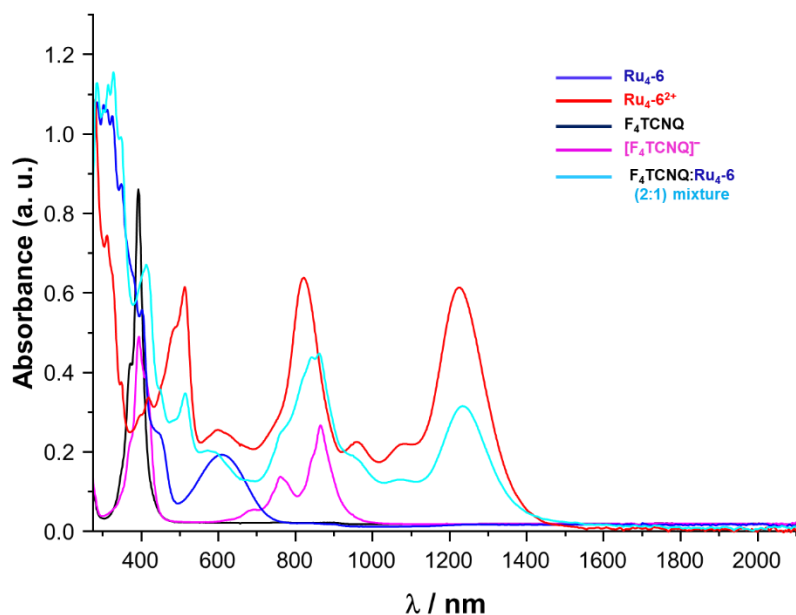

**Figure S35.** The UV/vis/NIR spectrum of **CT-2** salt (1:2 mixture of **Ru<sub>4</sub>-6** and F<sub>4</sub>TCNQ) is plotted with those of the neutral complex, neutral F<sub>4</sub>TCNQ, oxidized complex [**Ru<sub>4</sub>-6**]<sup>2+</sup> and mono-reduced F<sub>4</sub>TCNQ for comparison purposes.

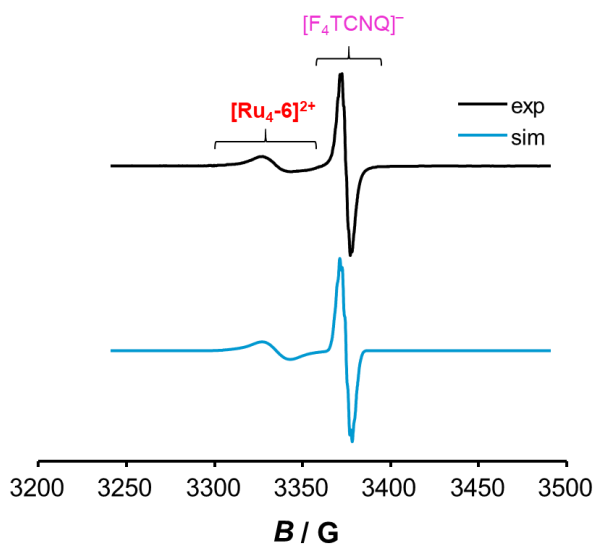

**Figure S36.** EPR spectrum of salt **CT-2**. Separate resonance signals for the radical cation and radical anion are clearly observed. The experimental spectrum is shown at the top and simulated one is at the bottom; *g*-values of 2.0240 and 1.9876 were obtained for [**Ru<sub>4</sub>-5**]<sup>2+</sup> and [F<sub>4</sub>TCNQ]<sup>•−</sup>, respectively.

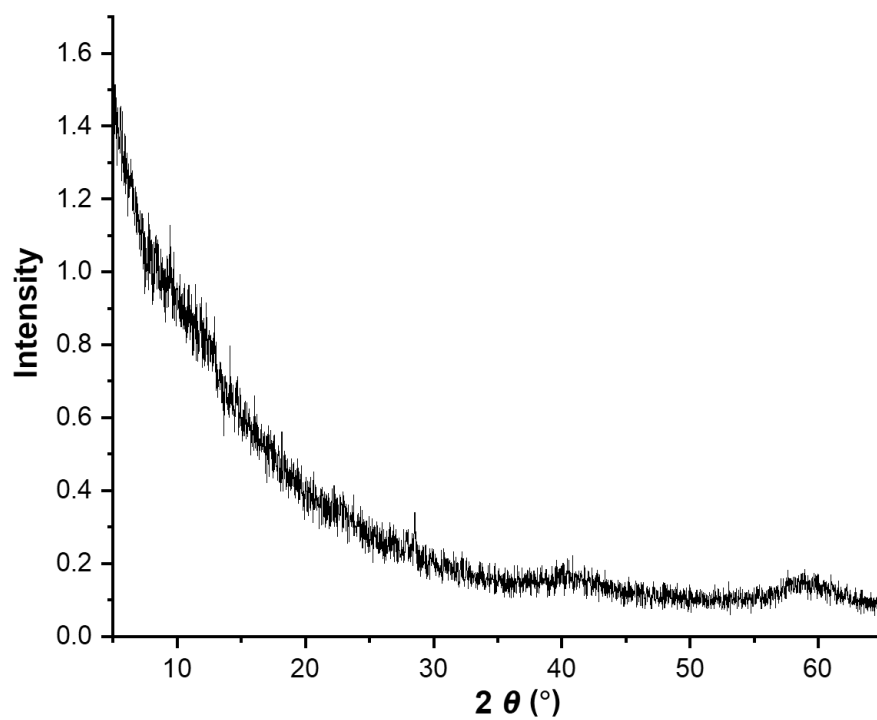

**Figure S37.** Powder X-ray diffraction (PXRD) pattern of the charge-transfer salt **CT-1** ( $[\text{Ru}_4\text{-5}]^{2+}[\text{F}_4\text{TCNQ}]_2^-$ ).

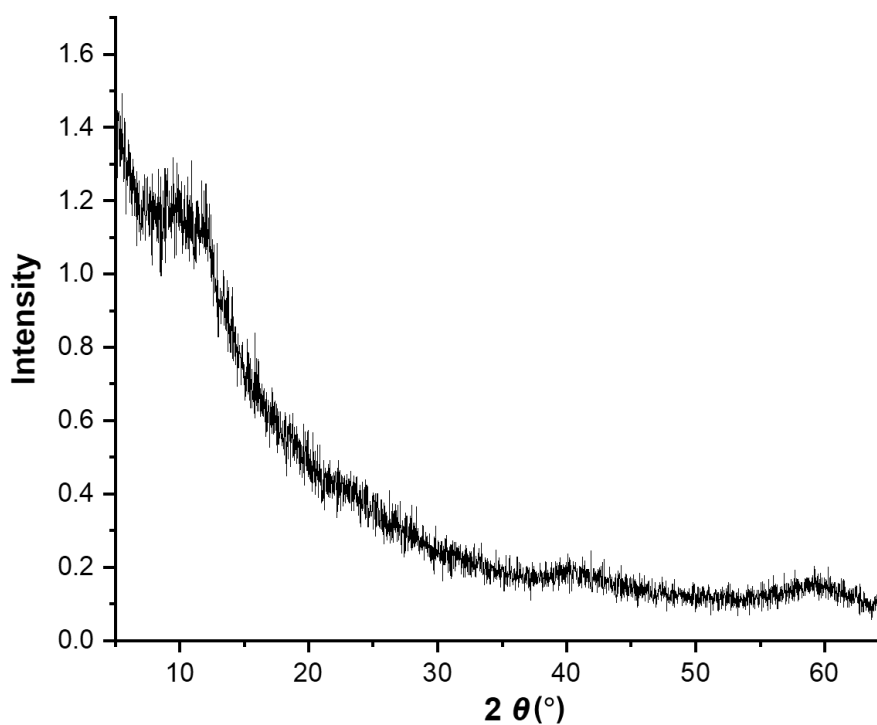

**Figure S38.** Powder X-ray diffraction (PXRD) pattern of the charge-transfer salt **CT-2** ( $[\text{Ru}_4\text{-6}]^{2+}[\text{F}_4\text{TCNQ}]_2^-$ ).
